# Supplementary material for: Three-dimensional Li3V2(PO4)3/C nanowire and nanofiber hybrid membrane as a self-standing, binder-free cathode for lithium ion batteries
Source: Royal Society of Chemistry journal article supplement (doi:10.1039/c6ra13686a), 2016-01-01
Supplement: c6ra13686a1.pdf [file c6ra13686a1.pdf]

Supporting information

**Three-dimensional  $\text{Li}_3\text{V}_2(\text{PO}_4)_3/\text{C}$  nanowires and nanofibers hybrid membrane as a self-standing, binder-free cathode for lithium ion batteries**

Mao-xiang Jing<sup>a,c\*</sup>, Zhi-chao Pi<sup>a</sup>, Hong-ai Zhai<sup>a</sup>, Jing-quan Li<sup>a</sup>, Li-li Chen<sup>a</sup>, Xiang-qian Shen<sup>a, b\*</sup>, Xiao-ming Xi<sup>b</sup>, Ke-song Xiao<sup>b</sup>

Fig. S1 shows the photograph of LVP/C nanowire and nanofiber hybrid membrane. It can be seen that a smooth and uniform precursor membrane was achieved by electrospinning, and after thermal-treatment, the self-standing, binder-free hybrid membrane shows good flexibility.

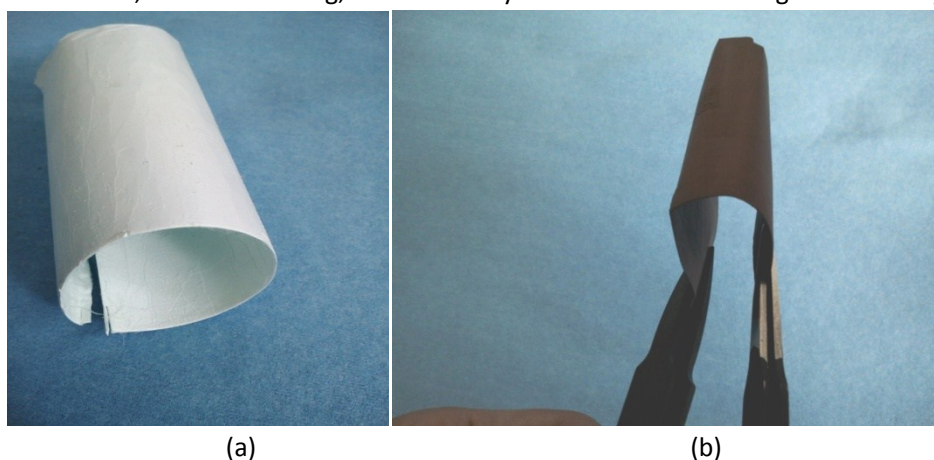

Fig.S1 Photograph of LVP/C nanowire and nanofiber hybrid membrane  
(a),precursor; (b), thermal treated

Fig.S2 shows the TG/DTA curves of the composite membrane. It can be seen that the total weight loss is about 14.9%, very close to the data from C-S analyzer. And the whole process is an exothermic process due to the oxidation of carbon.

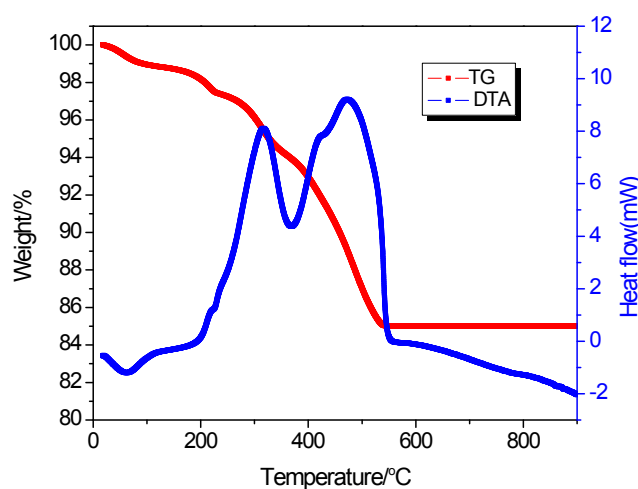

Fig.S2 TG/DTA curves of the LVP/C nanowire and nanofiber hybrid membrane

Fig. S3 shows the cycle performance of pure LVP/C nanofiber membrane electrode in the potential range of 3.0~4.8V. It can be seen that the discharge capacity was decreased from 108mAh/g to 77.5 mAh/g at 5C after 800 cycles.

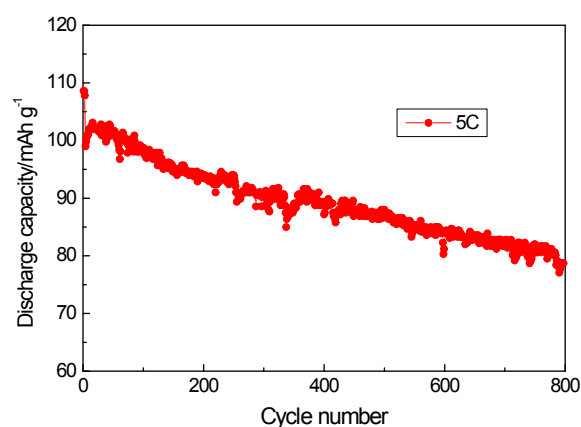

Fig. S3 Cycle performance of pure LVP/C nanofiber membrane electrode in the potential range of 3.0~4.8V.

Fig.S4 shows an equivalent circuit model according to the simulation. In this circuit,  $R_s$  represents the Ohmic resistance of the electrode system, including the electrolyte and the cell components.  $R_{ct}$  represents the interfacial charge transfer resistance, which is connected to the semicircle in the high frequency region.  $R_h$  represents the resistance of the SEI film. CPE is the double layer capacitance.  $Z_w$  represents Warburg impedance, which is described as a diffusive resistance of the Li ion within the electrode pores. The related values for resistance of  $R_s$ ,  $R_h$ , and  $R_{ct}$  are depicted in Table S1. The very high frequency impedance is similar for each material, which means they have the same ohmic resistance in the cell. Because of a hybrid of nanowire and fiber, the  $R_e$  and  $R_{ct}$  of hybrid electrode is lower than that of pure fiber electrode, which illustrates that the ion conductivity is improved greatly. Meanwhile, two semi-circles can be seen at high frequency region, which means there were two interfacial reaction in the electrode. The small semicircle belongs to the reaction of  $Li^+$  and SEI film of LVP nanowires, the other is due to the embedded LVP in carbon fibers.

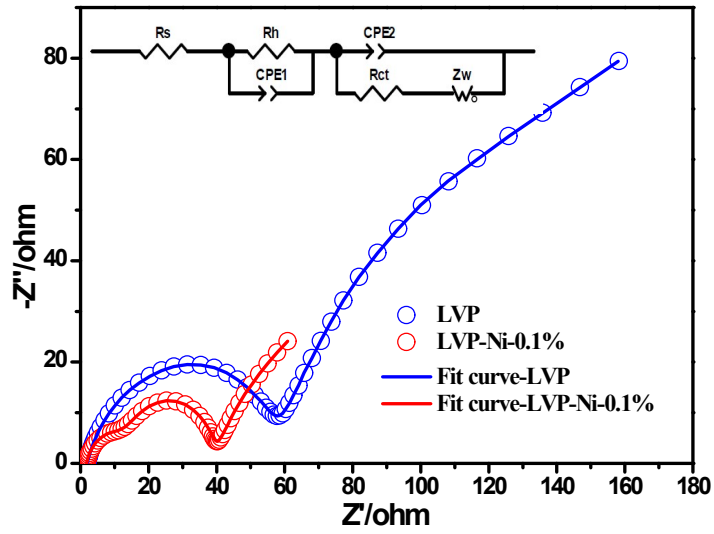

Fig.S4 The equivalent circuit for the Nyquist plot of LVP/C nanowire and nanofiber hybrid membrane

Table S1 EIS parameters

|        | Rs   | Rh    | Rct   |
|--------|------|-------|-------|
| LVP-Ni | 1.82 | 10.92 | 27.12 |
| LVP    | 1.97 | 26.44 | 35.96 |
